# TABLE OF CONTENTS

# ANESTHESIOLOGY

Volume 138

Issue 3

March 2023

**This Month in ANESTHESIOLOGY.....A1**  
**Science, Medicine, and the Anesthesiologist.....A13**  
**Infographics in Anesthesiology .....A17**  
**Editorial**

- Monitoring Respiratory Effort and Lung-distending Pressure Noninvasively during Mechanical Ventilation: Ready for Prime Time**  
*J. Dianti, E. C. Goligher.....235*
- Paradox of Power: Dynamic Tools to Predict Respiratory Failure in Spontaneously Breathing Patients**  
*D. R. Calabrese, M. J. London.....238*

**Perioperative Medicine**

**CLINICAL SCIENCE**

- ◇ **Comparison of Contralateral Acceleromyography and Electromyography for Posttétanic Count Measurement**  
*H. Joo, S. Cho, J. W. Lee, W. J. Kim, H. J. Lee, J. H. Woo, G. Lee, H. J. Baik.....241*

The agreement of posttétanic counts monitored in contralateral arms by acceleromyography and electromyography was determined in 35 patients given 0.6 mg/kg rocuronium after induction of anesthesia and calibration of the monitors, with additional doses of 0.3 mg/kg if required. Seventy-three percent of 226 pairs of acceleromyography– and electromyography–posttétanic count measurements indicated the same neuromuscular blockade status (intense or deep block). Of 184 pairs of posttétanic counts of 15 or less, 42 (23%) acceleromyography–posttétanic counts were equal to electromyography–posttétanic counts, 93 (50%) were more than electromyography counts, and 49 (27%) were less than electromyography counts.

- ◇ **Respiratory Effects of Biased Ligand Oliceridine in Older Volunteers: A Pharmacokinetic–Pharmacodynamic Comparison with Morphine**  
*P. Simons, R. van der Schrier, M. van Lemmen, S. Jansen, K. W. K. Kuijpers, M. van Velzen, E. Sarton, T. Nicklas, C. Michalsky, M. A. Demitrack, M. Fossler, E. Olofson, M. Niesters, A. Dahan.....249*

The hypothesis that oliceridine and morphine differ in their pharmacodynamic behavior, measured as effect on ventilation at an extrapolated end-tidal  $P_{CO_2}$  of 55 mmHg ( $\dot{V}_{E55}$ ), was tested in a four-arm, double-blind, randomized crossover study of eighteen 56- to 87-yr-old male and female volunteers. The effect-site oliceridine concentration causing a 50% depression of  $\dot{V}_{E55}$  was 39% higher than that of morphine. The onset and offset of the respiratory effect of oliceridine was five times faster than that of morphine.

- ◇ **Extended-age Out-of-sample Validation of Risk Stratification Index 3.0 Models Using Commercial All-payer Claims**  
*S. Greenwald, G. F. Chamoun, N. G. Chamoun, D. Clain, Z. Hong, R. Jordan, P. J. Manberg, K. Maheshwari, D. I. Sessler.....264*

In two different statewide databases, Risk Stratification Index 3.0 models worked well in younger and healthier adults. **SUPPLEMENTAL DIGITAL CONTENT IS AVAILABLE IN THE TEXT**

**Critical Care Medicine**

**CLINICAL SCIENCE**

- ◇ **Performance of Noninvasive Airway Occlusion Maneuvers to Assess Lung Stress and Diaphragm Effort in Mechanically Ventilated Critically Ill Patients**  
*H. J. de Vries, P. R. Tuinman, A. H. Jonkman, L. Liu, H. Qiu, A. R. J. Girbes, Y. Zhang, A. M. E. de Man, H.-J. de Grooth, L. Heunks.....274*

◇ Refers to This Month in ANESTHESIOLOGY  
 ◆ Refers to Editorial  
 🔊 This article has an Audio Podcast

🌐 See Supplemental Digital Content  
 📺 CME Article  
 🎬 This article has a Video Abstract

🔍 Readers' Toolbox  
 👁 This article has a Visual Abstract  
 OPEN This article is Open Access

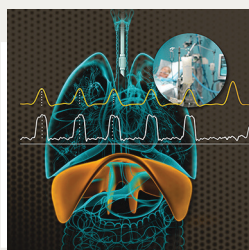

**ON THE COVER:** Monitoring and controlling lung stress and diaphragm effort has been hypothesized to limit lung injury and diaphragm injury. In this issue of ANESTHESIOLOGY, deVries *et al.* hypothesized that noninvasively measurable correlates would have strong discriminative performance in identifying extremes of lung stress and diaphragm effort. In an accompanying editorial, Dianti and Goligher examined the history of respiratory effort and proposed that these routine noninvasive measurements should become standard practice in the management of patients receiving mechanical ventilation. Cover illustration: A. Johnson, Vivo Visuals Studio.

- deVries *et al.*: Performance of Noninvasive Airway Occlusion Maneuvers to Assess Lung Stress and Diaphragm Effort in Mechanically Ventilated Critically Ill Patients, p. 274
- Dianti and Goligher: Monitoring Respiratory Effort and Lung-distending Pressure Noninvasively during Mechanical Ventilation: Ready for Prime Time, p. 235

A secondary analysis of two previous studies evaluated the ability of two transient inspiratory airway occlusion maneuvers (Pocc, the total drop in airway pressure during an occlusion, and PO.1, the drop in the first 100 ms) obtained from the mechanical ventilator to predict either diaphragm effort or lung stress. Neither PO.1 nor Pocc should be used to predict exact values for diaphragm effort or lung distending pressure. However, both maneuvers can reliably identify patients with low or high extremes in diaphragm effort and lung stress, where Pocc outperforms PO.1 based on the areas under the receiver operating characteristic curves. *SUPPLEMENTAL DIGITAL CONTENT IS AVAILABLE IN THE TEXT*

- 

**Mechanical Power Ratio and Respiratory Treatment Escalation in COVID-19 Pneumonia: A Secondary Analysis of a Prospectively Enrolled Cohort**  


*S. Gattarello, S. Coppola, E. Chiodaroli, T. Pozzi, L. Camporota, L. Saager, D. Chiumello, L. Gattinoni* .....289

Despite similar spontaneous tidal volumes, escalated patients had higher respiratory rate, minute ventilation, pleural pressure, and mechanical power ratios. Mechanical power, its ratio with the expected baseline value, and the pressure-rate index had the greatest associations with treatment escalation. *SUPPLEMENTAL DIGITAL CONTENT IS AVAILABLE IN THE TEXT*

- 

**Predicting Intensive Care Delirium with Machine Learning: Model Development and External Validation**  
*K. D. Gong, R. Lu, T. S. Bergamaschi, A. Sanyal, J. Guo, H. B. Kim, H. T. Nguyen, J. L. Greenstein, R. L. Winslow, R. D. Stevens*.....299

In a multicenter electronic health record database of 22,234 intensive care unit (ICU) patients from 2014 to 2015, delirium was identified using the Confusion Assessment Method for the ICU screen or Intensive Care Delirium Screening Checklist. Static and dynamic machine learning algorithms were trained, tested, and externally validated to predict the onset of delirium during the ICU stay. The static model using data from the first 24 h after ICU admission to predict delirium at any point during the ICU stay demonstrated higher discrimination compared with a widely cited reference model. The dynamic model was able to predict delirium up to 12 h in advance with reasonable discrimination and calibration. *SUPPLEMENTAL DIGITAL CONTENT IS AVAILABLE IN THE TEXT*

## Education

### CLASSIC PAPER REVISITED

- 
**Multidisciplinary Pain Management: A Tale of Two Outcomes**  
*S. H. Butler, J. D. Loeser* .....312

## IMAGES IN ANESTHESIOLOGY

- 
**Difficult Airway Management in Neonates: Fiberoptic Intubation via Laryngeal Mask Airway**  
*J. J. Thomas, M. Lingruen, A. Reddy, K. H. Chan* .....316

*SUPPLEMENTAL DIGITAL CONTENT IS AVAILABLE IN THE TEXT*

## REVIEW ARTICLE

- 

**Advanced Point-of-care Bedside Monitoring for Acute Respiratory Failure**  
*G. Cammarota, R. Simonte, F. Longhini, S. Spadaro, L. Vetrugno, E. De Robertis* .....317

Advanced respiratory monitoring involves several mini- or noninvasive tools, applicable at bedside, that have the potential to support clinicians in the management of acute respiratory failure toward the protection of the lung and respiratory muscles and the personalization of ventilatory strategy. *SUPPLEMENTAL DIGITAL CONTENT IS AVAILABLE IN THE TEXT*

## CORRESPONDENCE

- Hypotension and Cardiac Surgical Outcomes: Comment**  
*R. Descamps, A. Denisenko, M.-O. Fischer* .....335

- Hypotension and Cardiac Surgical Outcomes: Reply**  
*V. Rangasamy, M. A. de la Hoz, B. Subramaniam* .....336

- Alternative Sleep Apnea Treatment: Comment**  
*A. Roy, M. Mandal, P. Bhakta, B. O'Brien, A. M. Esquinas* .....337

- Alternative Sleep Apnea Treatment: Reply**  
*Y. Sakaguchi, N. Nozaki-Taguchi, S. Isono* .....338

## Reviews of Educational Materials

- We Are All Perfectly Fine: A Memoir of Love, Medicine and Healing**  
*K. E. McGoldrick* .....340

**Erratum** ..... 342

**Retraction** ..... 343

## Anesthesiology Reflections from the Wood Library-Museum

- Emanuel Papper's Ph.D.: Anesthesia's Romantic Ideals**  
*J. S. Moon* ..... 298

- Advertising McNeil's Pain Exterminator: A General for the Specific?**  
*M. L. Coleman and G. S. Bause* ..... 334

**Careers & Events** ..... A19

## INSTRUCTIONS FOR AUTHORS

The most recently updated version of the Instructions for Authors is available at [www.anesthesiology.org](http://www.anesthesiology.org). Please refer to the Instructions for the preparation of any material for submission to ANESTHESIOLOGY.

Manuscripts submitted for consideration for publication must be submitted in electronic format via Editorial Manager (<https://www.editorialmanager.com/aln>). Detailed directions for submission and the most recent version of the Instructions for Authors can be found on the Journal's Web site (<http://www.anesthesiology.org>). Books and educational materials for review should be sent to Alan Jay Schwartz, M.D., M.S.Ed., Director of Education, Department of Anesthesiology and Critical Care Medicine, The Children's Hospital of Philadelphia,

34th Street and Civic Center Blvd., Room 9327, Philadelphia, Pennsylvania 19104-4399. Article-specific permission requests are managed with Copyright Clearance Center's Rightslink service. Information can be accessed directly from articles on the journal Web site. More information is available at <http://anesthesiology.pubs.asahq.org/public/rightsandpermissions.aspx>. For questions about the Rightslink service, e-mail [customer-care@copyright.com](mailto:customer-care@copyright.com) or call 877-622-5543 (U.S. only) or 978-777-9929. Advertising and related correspondence should be addressed to Advertising Manager, ANESTHESIOLOGY, Wolters Kluwer Health, Inc., Two Commerce Square, 2001 Market Street, Philadelphia, Pennsylvania 19103 (Web site: <http://www.wkand-center.com/>). Publication of an advertisement in an ASA publication or on an ASA website does not constitute endorsement or evaluation by ASA or by ASA's publishing partners of the product or service described therein or of any representations or claims made by the advertiser with respect to the product or service.

**ANESTHESIOLOGY** (ISSN 0003-3022) is published monthly by Wolters Kluwer Health, Inc., 1800 Dual Highway, Suite 201, Hagerstown, MD 21740-6636. Business office: Two Commerce Square, 2001 Market Street, Philadelphia, PA 19103. Periodicals postage paid at Hagerstown, MD, and at additional mailing offices. Copyright © 2023, the American Society of Anesthesiologists. All Rights Reserved.

**Annual Subscription Rates:** *United States*—\$1175 Individual, \$2990 Institution, \$461 In-training. *Rest of World*—\$1238 Individual, \$3320 Institution, \$461 In-training. Single copy rate \$312. Subscriptions outside of North America must add \$58 for airfreight delivery. Add state sales tax, where applicable. The GST tax of 7% must be added to all orders shipped to Canada (Wolters Kluwer Health, Inc.'s GST Identification #895524239, Publications Mail Agreement #1119672). Indicate in-training status and name of institution. Institution rates apply to libraries, hospitals, corporations, and partnerships of three or more individuals. Subscription prices outside the United States must be prepaid. Prices subject to change without notice. Subscriptions will begin with currently available issue unless otherwise requested. Visit us online at [www.lww.com](http://www.lww.com).

Individual and in-training subscription rates include print and access to the online version. Online-only subscriptions for individuals (\$389) and persons in training (\$389) are available to nonmembers and may be ordered by downloading a copy of the Online Subscription FAXback Form from the Web site, completing the information requested, and faxing the completed form to 301-223-2400. Institutional rates are for print only; online subscriptions are available via Ovid. Institutions can choose to purchase a print and online subscription together for a discounted rate. Institutions that wish to purchase a print subscription, please contact Wolters Kluwer Health,

Inc., 1800 Dual Highway, Suite 201, Hagerstown, MD 21740-6636; phone: 800-638-3030; fax: 301-223-2400. Institutions that wish to purchase an online subscription or online with print, please contact the Ovid Regional Sales Office near you or visit [www.ovid.com/site/index.jsp](http://www.ovid.com/site/index.jsp) and select Contact and Locations.

**Address for non-member subscription information, orders, or change of address:** Wolters Kluwer Health, Inc., 1800 Dual Highway, Suite 201, Hagerstown, MD 21740-6636; phone: 800-638-3030; fax: 301-223-2400.

**Address for member subscription information, orders, or change of address:** Members of the American Society of Anesthesiologists receive the print and online journal with their membership. To become a member or provide a change of address, please contact the American Society of Anesthesiologists, 1061 American Lane, Schaumburg, Illinois 60173-4973; phone: 847-825-5586; fax: 847-825-1692; e-mail: [membership@ASAhq.org](mailto:membership@ASAhq.org). For all other membership inquiries, contact Wolters Kluwer Health, Inc., Customer Service Department, P.O. Box 1610, Hagerstown, MD 21740; phone: 800-638-3030; fax: 301-223-2400.

**Postmaster:** Send address changes to ANESTHESIOLOGY, P.O. BOX 1610, Hagerstown, MD 21740.

**Advertising:** Please contact Kelle Gray, National Account Manager, Health Learning, Research & Practice, Medical Journals, Wolters Kluwer Health, Inc.; phone: 843-261-4221; e-mail: [Kelle.Gray@wolterskluwer.com](mailto:Kelle.Gray@wolterskluwer.com). For classified advertising: Dave Wiegand, Recruitment Advertising Representative, Wolters Kluwer Health, Inc.; phone: 847-361-6128; e-mail: [Dave.Wiegand@wolterskluwer.com](mailto:Dave.Wiegand@wolterskluwer.com).
